# Supplementary material for: In situ study on interactions between hydroxyl groups in kaolinite and re-adsorption water
Source: Royal Society of Chemistry journal article supplement (doi:10.1039/d0ra01905d), 2020-01-01
Supplement: d0ra01905d1.pdf [file d0ra01905d1.pdf]

## Supporting information

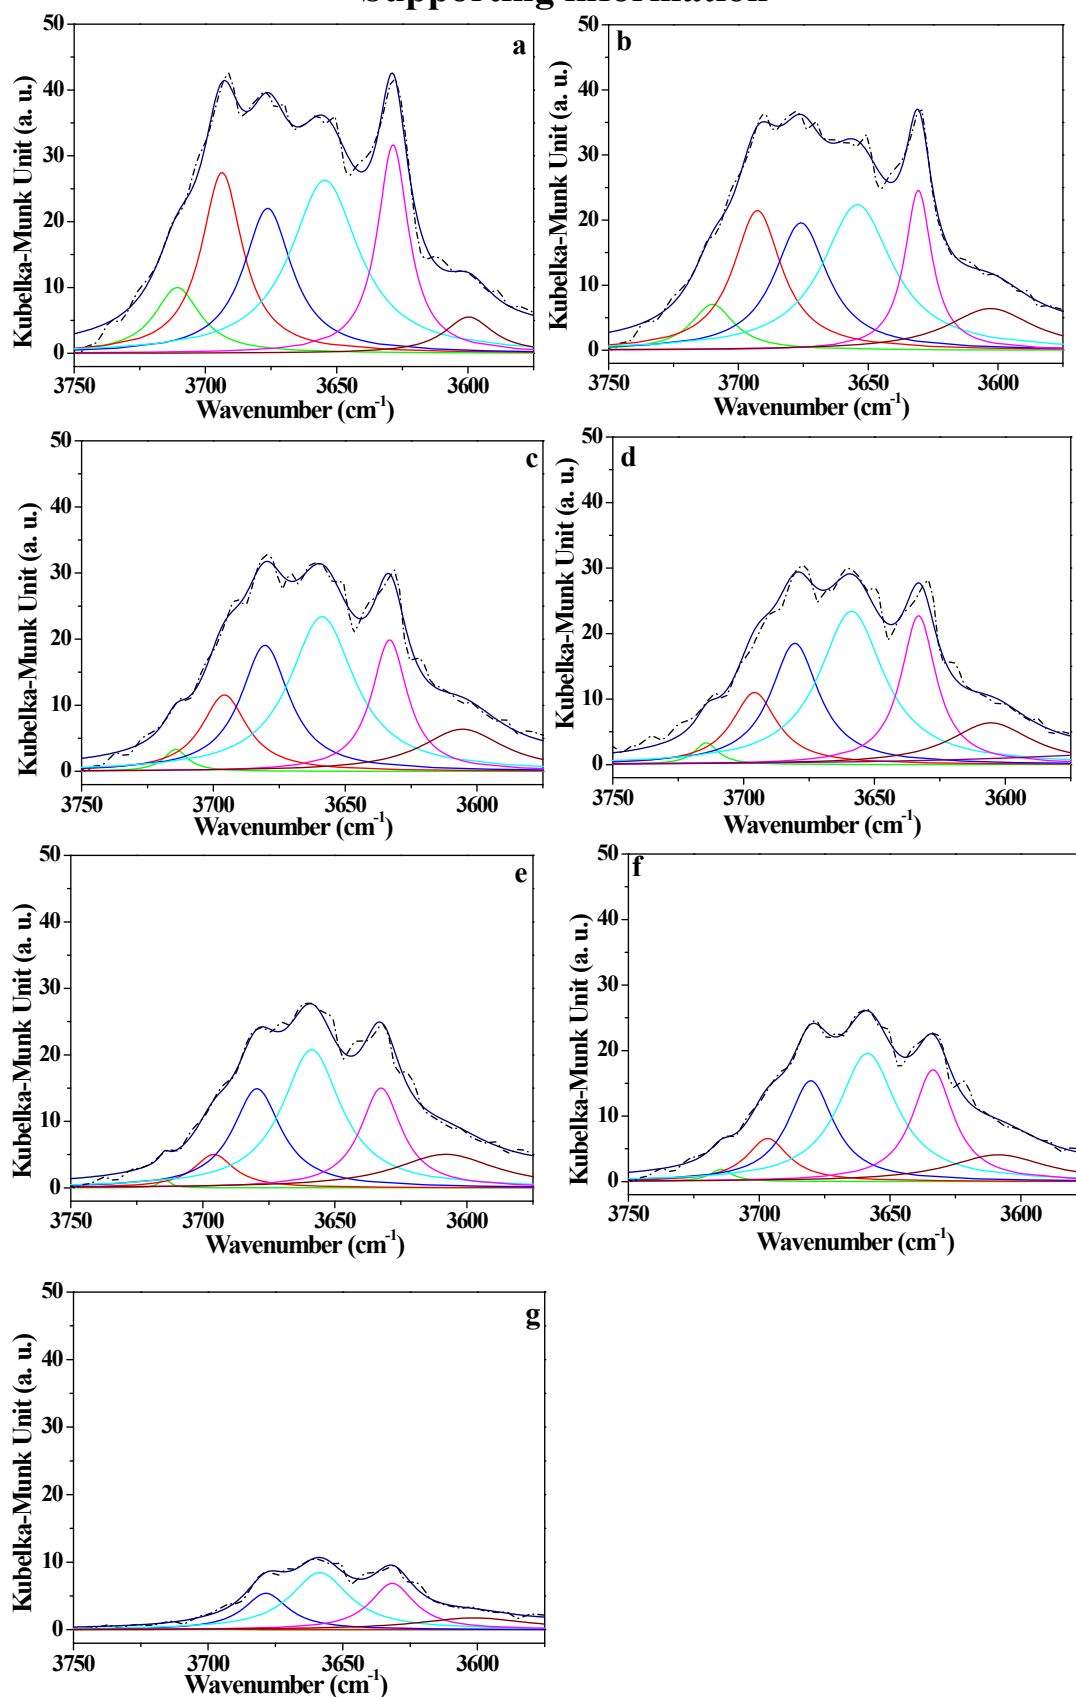

Fig. S<sub>1</sub> O-H region deconvolution of kaolinite containing re-adsorption D<sub>2</sub>O heated at 100 °C (a), 200 °C (b), 300 °C (c), 400 °C (d), 500 °C (e), 600 °C (f) and 650 °C (g)

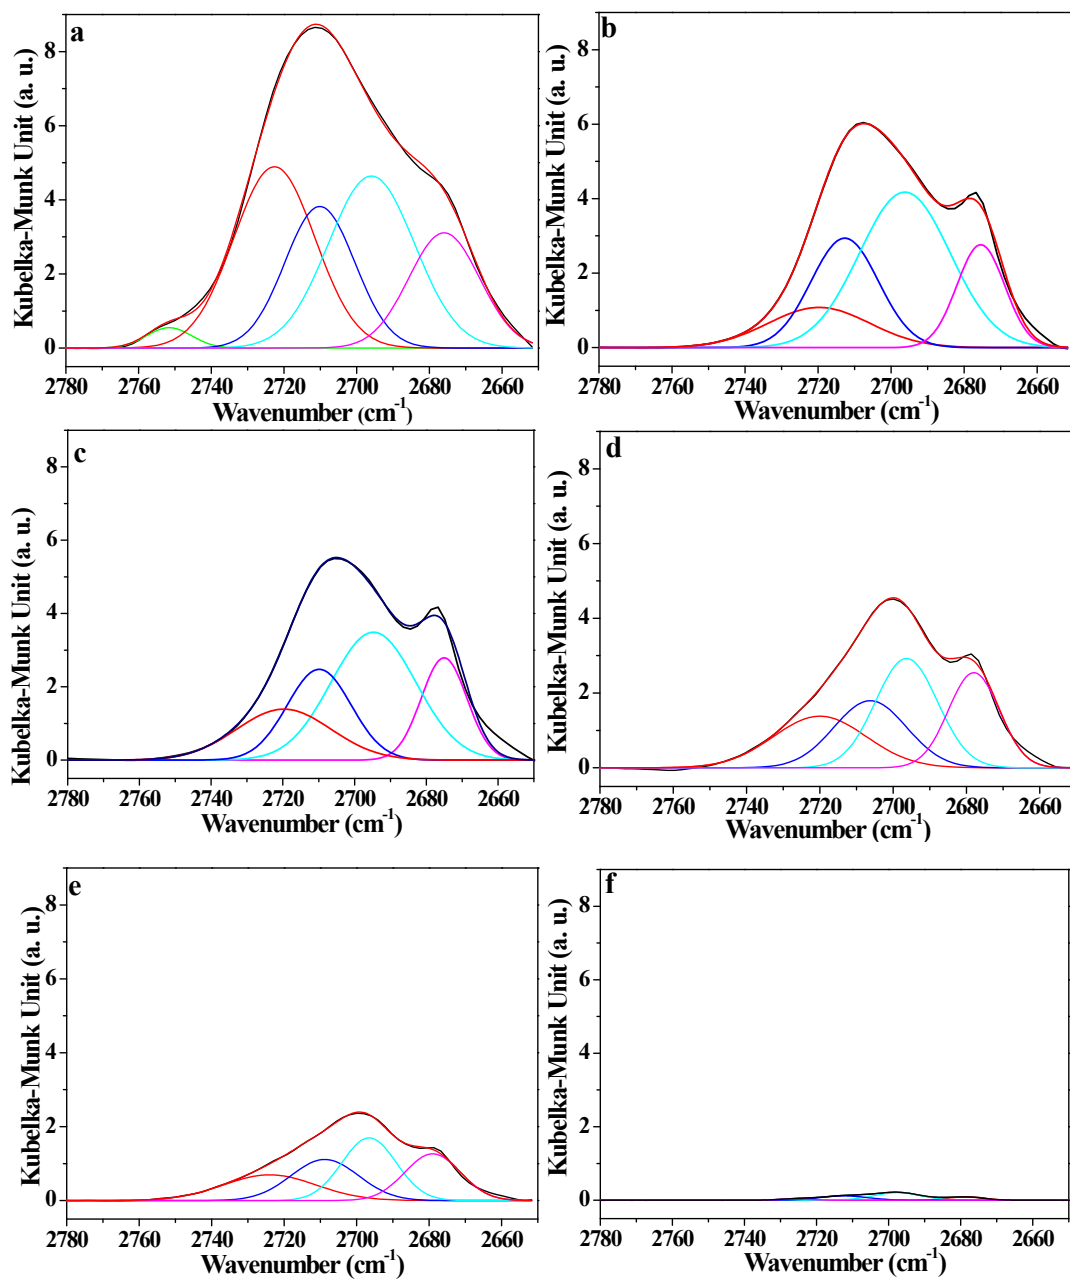

Fig. S<sub>2</sub> O-D region deconvolution of kaolinite containing re-adsorption D<sub>2</sub>O heated at 200 °C (a), 300 °C (b), 400 °C (c), 500 °C (d), 600 °C (e) and 650 °C (f)
